# Supplementary material
Source: PubMed Central journal article supplement (PMC6941345)
Supplement: NIHMS1545884-supplement-Supplementary_appendix.pdf [file NIHMS1545884-supplement-Supplementary_appendix.pdf]

# THE LANCET

## Respiratory Medicine

### Supplementary appendix

This appendix formed part of the original submission and has been peer reviewed. We post it as supplied by the authors.

Supplement to: Beigel JH, Aga E, Elie-Turenne M-C, et al, on behalf of the IRC005 Study Team. Anti-influenza immune plasma for the treatment of patients with severe influenza A: a randomised, double-blind, phase 3 trial. *Lancet Respir Med* 2019; published online Sept 30. [http://dx.doi.org/10.1016/S2213-2600\(19\)30199-7](http://dx.doi.org/10.1016/S2213-2600(19)30199-7).

## Supplementary Material

### **Anti-influenza immune plasma for the treatment of patients with severe influenza A: a randomised, double-blind, phase 3 trial**

John H Beigel, Evgenia Aga, Marie-Carmelle Elie-Turenne, Josalyn Cho, Pablo Tebas, Carol L Clark, Jordan P. Metcalf, Caroline Ozment, Kanakatte Raviprakash, Joy Beeler, H. Preston Holley, Jr., Stephanie Warner, Carla Chorley, H. Clifford Lane, Michael D. Hughes, Richard T Davey on behalf of the IRC005 Study Team

**IRC005 Study Team**

The following sites / investigators participated in the IRC005 study.

Beaumont Hospital - Royal Oak, Royal Oak, MI  
Carol Clark, MD, MBA  
Carol.Clark@beaumont.org

Beaumont Hospital – Troy, Troy, MI  
Aveh Bastani, MD  
Aveh.Bastani@beaumont.org

Boston Children's Hospital, Boston, MA  
Adrienne Randolph, MD  
Adrienne.Randolph@childrens.harvard.edu

Bridgeport Hospital, Bridgeport, CT  
David Kaufman, MD  
Current email: david.a.kaufman@nyumc.org

Carolinas Medical Center, Charlotte, NC  
Christopher Polk, MD  
Christopher.Polk@carolinashealthcare.org

Children's Hospital Colorado, Aurora, CO  
Suchitra Rao, MBBS  
Suchitra.Rao@childrenscolorado.org

Cincinnati Children's Hospital Medical Center, Cincinnati, OH  
Erika Stalets, MD  
Erika.Stalets@cchmc.org

Creighton University, Omaha, NE  
Lee Morrow, MD  
lmorrow@creighton.edu

Duke University Medical Center, Durham, NC  
Caroline Ozment, MD  
Caroline.Ozment@duke.edu

Johns Hopkins University, Baltimore, MD  
Shmuel Shoham, MD  
sshoham1@jhmi.edu

Madigan Army Medical Center, Tacoma, WA 98431  
Christina Schofield, MD

Christina.M.Schofield2.ctr@mail.mil

Massachusetts General Hospital, Boston, MA

Josalyn Cho

Josalyn.Cho@mgh.harvard.edu

Mayo Clinic Hospital, Rochester, MN

Philippe Bauer, MD

Bauer.Philippe@mayo.edu

Naval Medical Center San Diego, San Diego, CA

Ryan Maves, MD

Ryan.C.Maves.mil@mail.mil

New York University, New York, NY

William Borkowsky, MD

borkow01@med.nyu.edu

Rush University Medical Center, Chicago, IL

Michael Lin, MD

Michael\_Lin@rush.edu

UCLA, Los Angeles, CA

Jaime Deville, MD

JDeville@mednet.ucla.edu

University of Arizona Health Sciences Center, Tucson, Arizona

Charles Cairns, MD

Current email: cairnsc@uau.ac.ae

University of Cincinnati, Cincinnati, OH

Carl Fichtenbaum, MD

fichtecj@ucmail.uc.edu

University of Colorado Denver, Aurora, CO

Michelle Barron, MD

Michelle.Barron@ucdenver.edu

University of Florida, Gainesville, FL

Marie-Carmelle Elie, MD

elie@ufl.edu

University of Maryland Medical Center, Baltimore, MD

Lewis Rubinson, MD, PhD

LRubinson@umm.edu

University of Massachusetts Medical School, Worcester, MA  
Robert Finberg, MD  
Robert.Finberg@umassmed.edu

University of Michigan, Ann Arbor, MI  
Pauline Park, MD  
parkpk@med.umich.edu

University of Oklahoma Health Sciences Center, Oklahoma City, OK  
Jordan P. Metcalf, MD  
Jordan-Metcalf@ouhsc.edu

University of Pennsylvania, Philadelphia, PA  
Pablo Tebas, MD  
Pablo.Tebas@uphs.upenn.edu

University of Pittsburgh, Pittsburgh, PA  
Minh-Hong Nguyen, MD  
nguyenh@dom.pitt.edu

University of Texas Southwestern Medical Center, Dallas, TX  
Mamta Jain, MD  
Mamta.Jain@utsouthwestern.edu

University of Vermont Medical Center, Burlington, VT  
Renee D. Stapleton, MD, PhD  
Renee.Stapleton@med.uvm.edu

Washington University School of Medicine, St. Louis, MO  
John Lin, MD  
lin\_jo@kids.wustl.edu

The following sites collected the high titer anti-influenza immune plasma that was used in the IRC005 study:

Mississippi Valley Regional Blood Center  
Memorial Blood Centers  
Gulf Coast Regional Blood Center

In addition to writing group, the following study team members contributed significantly to the conduct of the IRC005 trial:

National Institute of Allergy and Infectious Diseases  
Julie Metcalf, Jerome Pierson, Susan Vogel, Michael Belson, Kelly Cahill, John Tierney

Leidos Biomedical  
Beth Baseler, Shelley Simpson, Joy Beeler, H. Preston Holley, Jr., Mi Ha Kim,  
Olukayode Koleoso, Marisol Goss, Katelyn Patterson, Christina Burks, Carla Chorley,

Suzanne Dolney, Theresa Engel, M. Tauseef Rehman, Robin Dewar, Ven Natarajan, Kyndal Cook, Adam Rupert, Randy Stevens, Tim Paul, Chris Jacobs, Vanessa Eccard-Koons, Molly Buehn

Social Scientific Systems

Margaret Sanchez Edwards, Caroline English, Sandy Miller, Dorothy O'Neil, Dana Dooley, Ricki Kahl, Heather Kapushoc, Paula Muir, Catherine Morales, Stephanie Warner

Harvard T.H. Chan School of Public Health

Evgenia Aga, Michael Hughes, Sara McCallum, Yajing Bao

Thermo Fisher Scientific Inc

Christine Demasco-Cody, Stacy Floyd, Alex Gonzalez, Jahme McMillen

Infectious Disease Clinical Research Program

Janine Danko, Chris Coles

Naval Medical Research Center

Daniel Ewing, Yolanda Alcorta

We also wish to acknowledge the advice and assistance of the NIAID intramural Data Safety Monitoring Board in guiding the progress of the study: William Blackwelder (chair), Carol Tacket, James Baraniuk, Lawrence Moulton, David Parenti, with ad hoc members Michael Busch, David Kimberlin, Jeanne Sheffield, and Arnold Monto

**Supplemental methods:****Sample Size and Power Considerations**

The planned sample size for the trial was 150 subjects, randomized in an approximately 2:1 ratio to high-titer versus low-titer anti-influenza plasma. To evaluate the power of the study, the following assumptions were made:

- a. The primary analysis would compare the high-titer and low-titer plasmas using a proportional odds model and a two-sided Type I error rate of 0.05.
- b. It was anticipated that very few of these subjects would be randomized and not start study plasma infusion (and so be excluded from the primary analysis) or be lost to follow-up prior to Day 7 (and so have missing data for the primary endpoint). In addition, power is reduced slightly and hence the effective sample size is reduced by interim analyses reviewed by the DSMB. Conservatively, a 10% reduction in the total sample size from 150 to 135 subjects was made to allow for these issues.
- c. Data from the control arm of IRC002(1) for adults with influenza A infection, NEW score  $\geq 3$ , and duration of time from onset of symptoms of influenza to randomization  $\leq 6$  days, suggested the distribution of subjects in the low-titer arm for the primary endpoint shown in the following table:

**Anticipated Distribution of Subjects in the Ordinal Scale**

|                                                                 | <b>Low-Titer Arm</b> | <b>High-Titer Arm</b> |           |
|-----------------------------------------------------------------|----------------------|-----------------------|-----------|
|                                                                 | (Based on IRC 002)   | 80% Power             | 90% Power |
| Died                                                            | 10%                  | 4.3%                  | 3.7%      |
| In ICU                                                          | 35%                  | 20.4%                 | 18.4%     |
| Non-ICU hospitalization, requiring supplemental oxygen          | 25%                  | 23.6%                 | 22.6%     |
| Non-ICU hospitalization, not requiring supplemental oxygen      | 10%                  | 13.3%                 | 13.4%     |
| Not hospitalized, but unable to resume normal activities        | 5%                   | 7.9%                  | 8.2%      |
| Not hospitalized, but with full resumption of normal activities | 15%                  | 30.6%                 | 33.7%     |
| Proportional odds ratio comparing high titer to low titer       |                      | 2.50                  | 2.88      |

Based on the above assumptions, the table also shows the type of true difference (assuming proportional odds) that would be detected with 80% or 90% power. These powers were obtained using the PASS software (NCSS, Kaysville, Utah). For example,

the study would have 80% power to detect a proportional odds ratio of 2.50. This is the odds ratio that arises when comparing the proportion not hospitalized and able to resume normal activities in the high-titer arm (30.6%) to that in the low-titer arm (15%). The proportional odds model assumes that the same odds ratio applies to the cumulative proportions moving up the ordinal scale: for example, for the proportion not hospitalized in the high-titer arm ( $30.6+7.9=38.5\%$ ) to that in the low-titer arm ( $15+5=20\%$ ); or for the proportion alive and not in an ICU in the high-titer arm ( $30.6+7.9+13.3+23.6=75.4\%$ ) to that in the low-titer arm ( $15+5+10+25=55\%$ ).



**Supplemental Tables and Figures:**

**Supplemental Figure 1. HAI titres over time by subjects and randomized treatments. (boxes span from the lower limit of the 95% CI to upper limit of the 95% CI)**

**A) influenza A/California/7/2009 H1N1**

**B) influenza A/Switzerland/9715293/2013 H3N2**

**C) influenza A/Hong Kong/4801/2014 H3N2**

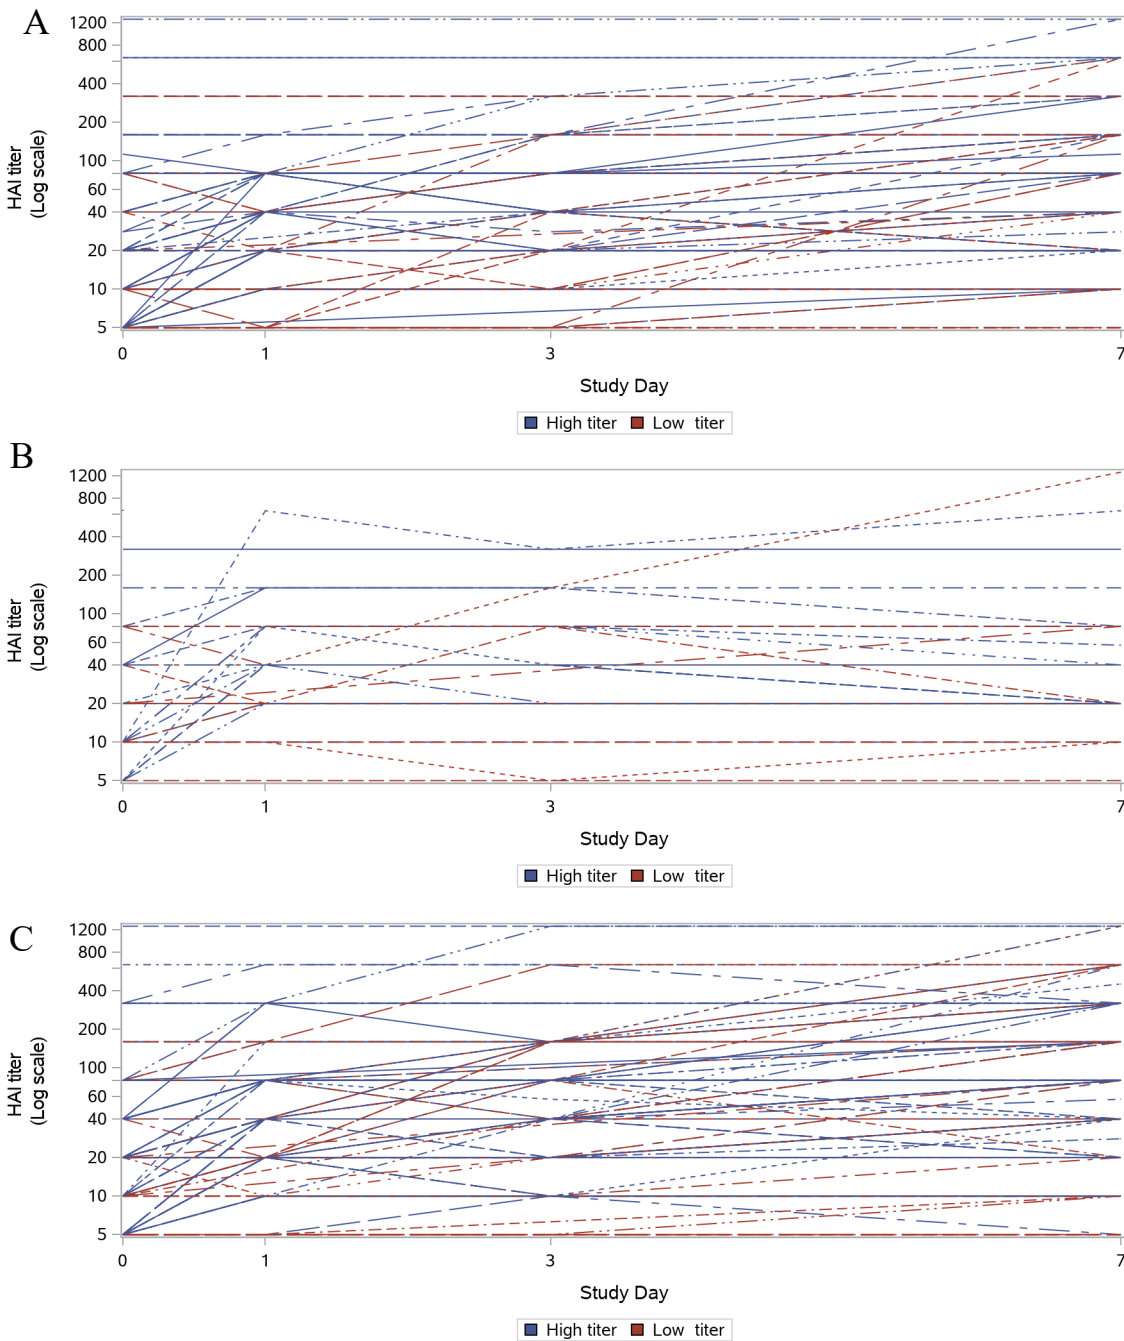

**Supplemental Figure 2. HAI titres changes over time by randomized treatments.**  
**(boxes span from the lower limit of the 95% CI to upper limit of the 95% CI)**

- A) influenza A/California/7/2009 H1N1**
- B) influenza A/Switzerland/9715293/2013 H3N2**
- C) influenza A/Hong Kong/4801/2014 H3N2**

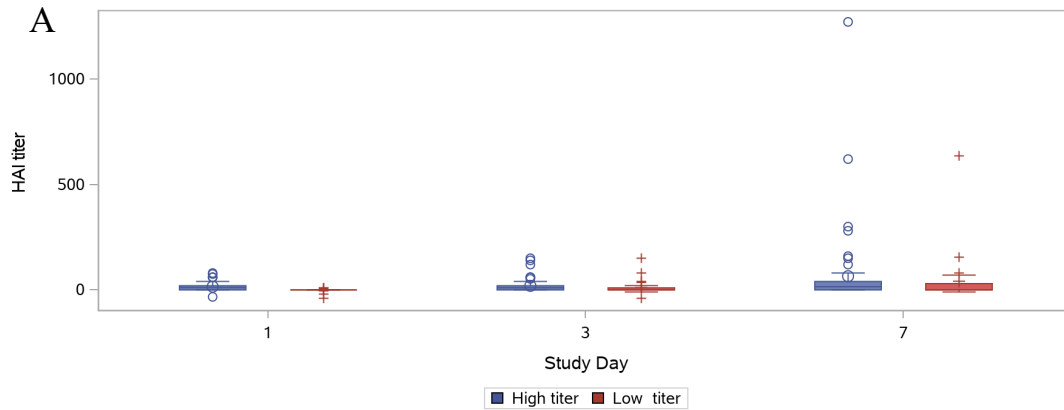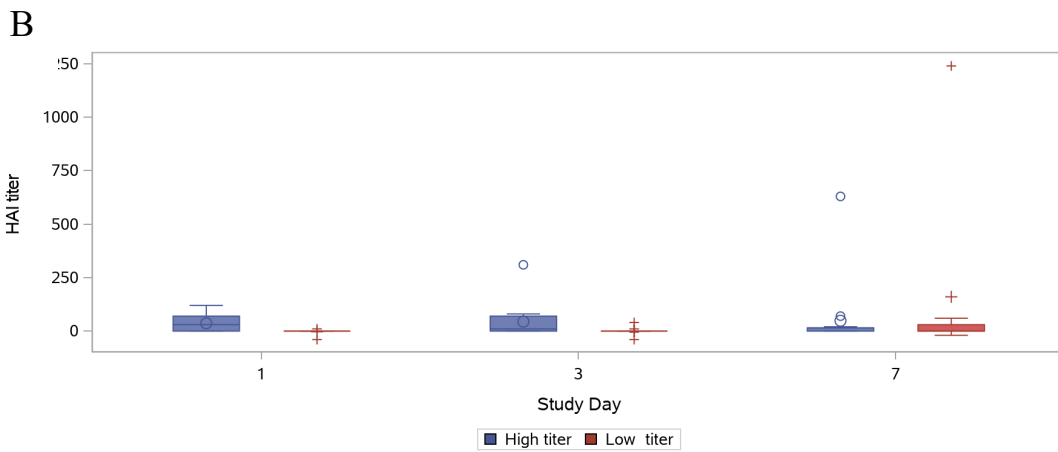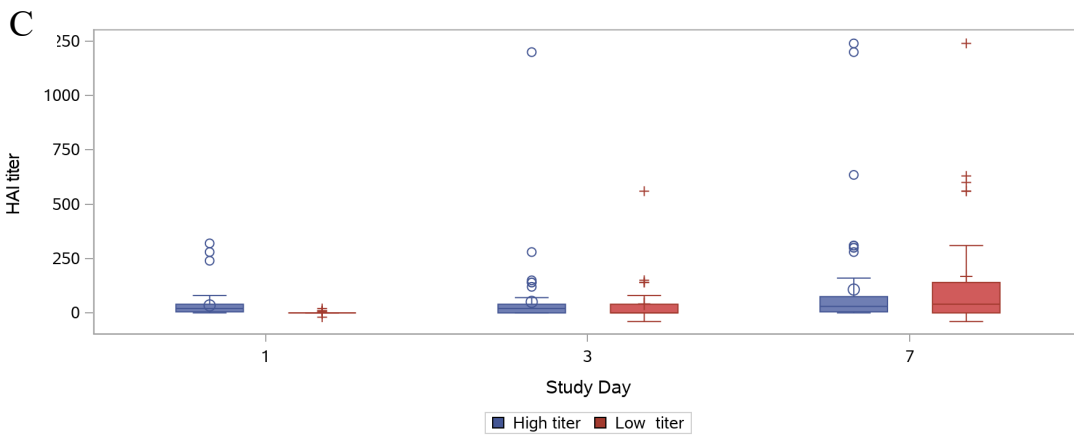

*Note: As log scale y-axis cannot support zero or negative change values, the axis are presented as linear*

**Supplemental Table 1. HAI in plasma infusion (all seasons, tested to vaccine strain for a given year)**

| First Unit                               |                 | Total<br>(N=138) | Randomized treatment    |                        |
|------------------------------------------|-----------------|------------------|-------------------------|------------------------|
|                                          |                 |                  | High<br>titer<br>(N=91) | Low<br>titer<br>(N=47) |
| <b>A/California/7/2009 (H1N1)</b>        | N               | 80               | 53                      | 27                     |
|                                          | Median (Q1, Q3) | 160 (10, 320)    | 320 (160, 453)          | 5 (5, 10)              |
| <b>A/Michigan/45/2015 (H1N1)</b>         | N               | 58               | 38                      | 20                     |
|                                          | Median (Q1, Q3) | 160 (5, 320)     | 240 (160, 320)          | 5 (5, 5)               |
| <b>A/Switzerland/9715293/2013 (H3N2)</b> | N               | 35               | 23                      | 12                     |
|                                          | Median (Q1, Q3) | 160 (5, 320)     | 160 (160, 453)          | 5 (5, 8)               |
| <b>A/HongKong/4801/2014 (H3N2)</b>       | N               | 103              | 68                      | 35                     |
|                                          | Median (Q1, Q3) | 160 (10, 320)    | 320 (160, 547)          | 5 (5, 10)              |
| <b>Second Unit</b>                       |                 |                  |                         |                        |
| <b>A/California/7/2009 (H1N1)</b>        | N               | 71               | 48                      | 23                     |
|                                          | Median (Q1, Q3) | 160 (10, 320)    | 320 (160, 320)          | 5 (5, 10)              |
| <b>A/Michigan/45/2015 (H1N1)</b>         | N               | 58               | 38                      | 20                     |
|                                          | Median (Q1, Q3) | 160 (5, 320)     | 160 (160, 320)          | 5 (5, 5)               |
| <b>A/Switzerland/9715293/2013 (H3N2)</b> | N               | 31               | 21                      | 10                     |
|                                          | Median (Q1, Q3) | 160 (10, 640)    | 640 (160, 905)          | 5 (5, 10)              |
| <b>A/HongKong/4801/2014 (H3N2)</b>       | N               | 98               | 65                      | 33                     |
|                                          | Median (Q1, Q3) | 160 (5, 320)     | 320 (160, 320)          | 5 (5, 5)               |

**Supplemental Table 2. Influenza Viral Shedding by Treatment Arm**

| Influenza virus in OP sample at Day 3 | Randomized treatment |                      |                     | p-value* | Exact logistic regression<br>High titer vs. Low titer |              |         |
|---------------------------------------|----------------------|----------------------|---------------------|----------|-------------------------------------------------------|--------------|---------|
|                                       | Total<br>(N=138)     | High titer<br>(N=91) | Low titer<br>(N=47) |          | Odds ratio                                            | 95% CI       | p-value |
| Detectable                            | 100 (80%)            | 65 (76%)             | 35 (88%)            | 0.23     | 0.47                                                  | [0.13, 1.43] | 0.23    |
| Undetectable                          | 25 (20%)             | 20 (24%)             | 5 (13%)             |          |                                                       |              |         |
| Died prior to Day 3                   | 1                    | 1                    | 0                   |          |                                                       |              |         |
| Lost to follow-up prior to Day 3      | 1                    | 0                    | 1                   |          |                                                       |              |         |
| In follow-up but no result            | 11                   | 5                    | 6                   |          |                                                       |              |         |

\*Fisher's exact test (detectable vs. undetectable)

The category 'Detectable' includes results reported as '<75 copies/mL'

**Table 3. Disposition following initial hospitalization**

|                                               | N                                         | Total<br>(N=138) | Randomized<br>treatment |                        | p-value* | Proportional odds model<br>High titer vs. Low titer |              |         |
|-----------------------------------------------|-------------------------------------------|------------------|-------------------------|------------------------|----------|-----------------------------------------------------|--------------|---------|
|                                               |                                           |                  | High<br>titer<br>(N=91) | Low<br>titer<br>(N=47) |          | Odds<br>ratio                                       | 95% CI       | p-value |
| Disposition following initial hospitalization |                                           | 138              | 91                      | 47                     | 0.12     | 1.73                                                | [0.87, 3.44] | 0.12    |
|                                               | Death                                     | 8 (6%)           | 4 (4%)                  | 4 (9%)                 |          |                                                     |              |         |
|                                               | Ongoing at 28 days                        | 6 (4%)           | 3 (3%)                  | 3 (6%)                 |          |                                                     |              |         |
|                                               | Long-term care / Chronic Nursing Facility | 11 (8%)          | 7 (8%)                  | 4 (9%)                 |          |                                                     |              |         |
|                                               | Transferred to rehabilitation             | 7 (5%)           | 4 (4%)                  | 3 (6%)                 |          |                                                     |              |         |
|                                               | Home with home health / other assistance  | 21 (15%)         | 13 (14%)                | 8 (17%)                |          |                                                     |              |         |
|                                               | Home without assistance                   | 85 (62%)         | 60 (66%)                | 25 (53%)               |          |                                                     |              |         |

\*Exact Wilcoxon test

Test of proportional odds assumption: p-value = 0.99

NOTE: an odds ratio of greater than one is indicative of better disposition for the high titer group versus the low titer group

**Table 4: PEW Score at Days 0, 3 and 7**

|                    |                      | Randomized treatment |                        |                       |
|--------------------|----------------------|----------------------|------------------------|-----------------------|
|                    |                      | Total<br>(N=13)      | High<br>titer<br>(N=8) | Low<br>titer<br>(N=5) |
| PEW Score at Day 0 | Median (Q1, Q3)      | 8 (5, 12)            | 9.0 (5.0, 11.5)        | 8 (4, 13)             |
|                    | Min, Max             | 3, 16                | 3, 13                  | 3, 16                 |
|                    | > 0                  | 13 (100%)            | 8 (100%)               | 5 (100%)              |
|                    | N with imputed Score | 0                    | 0                      | 0                     |
| PEW Score at Day 3 | Median (Q1, Q3)      | 5 (3, 9)             | 6.5 (5.0, 10.5)        | 3 (2, 4)              |
|                    | Min, Max             | 2, 98                | 3, 98                  | 2, 12                 |
|                    | > 0                  | 13 (100%)            | 8 (100%)               | 5 (100%)              |
|                    | N with imputed Score | 2                    | 2                      | 0                     |
| PEW Score at Day 7 | Median (Q1, Q3)      | 3 (1, 5)             | 3.5 (1.0, 5.5)         | 2 (1, 3)              |
|                    | Min, Max             | 0, 98                | 1, 98                  | 0, 8                  |
|                    | > 0                  | 12 (92%)             | 8 (100%)               | 4 (80%)               |
|                    | N with imputed Score | 1                    | 1                      | 0                     |

*For subjects who died before the evaluation day (and so are assumed to have a worse outcome than other surviving subjects) a Score of 99 is imputed*

*For subjects who were on ECMO on the evaluation day (and so are assumed to have a worse outcome than other surviving subjects but better outcome than non-surviving subjects) a Score of 98 is imputed*

*For other surviving subjects with a missing Score, the Score was imputed with the last available Score carried forward*

**Table 5: PELOD Score at Days 0, 3 and 7**

|                      |                      | Randomized treatment |                        |                       |
|----------------------|----------------------|----------------------|------------------------|-----------------------|
|                      |                      | Total<br>(N=12)      | High<br>titer<br>(N=8) | Low<br>titer<br>(N=4) |
| PELOD Score at Day 0 | Median (Q1, Q3)      | 0.5 (0.0, 3.0)       | 0 (0, 1)               | 3.0 (1.5, 12.0)       |
|                      | Min, Max             | 0, 32                | 0, 32                  | 0, 21                 |
|                      | > 0                  | 6 (50%)              | 3 (38%)                | 3 (75%)               |
|                      | N with imputed Score | 0                    | 0                      | 0                     |
| PELOD Score at Day 3 | Median (Q1, Q3)      | 0.0 (0.0, 20.5)      | 0 (0, 10)              | 17.0 (6.5, 26.0)      |
|                      | Min, Max             | 0, 98                | 0, 98                  | 0, 31                 |
|                      | > 0                  | 5 (42%)              | 2 (25%)                | 3 (75%)               |
|                      | N with imputed Score | 3                    | 3                      | 0                     |
| PELOD Score at Day 7 | Median (Q1, Q3)      | 0.0 (0.0, 6.5)       | 0.0 (0.0, 5.5)         | 1.5 (0.0, 12.0)       |
|                      | Min, Max             | 0, 98                | 0, 98                  | 0, 21                 |
|                      | > 0                  | 5 (42%)              | 3 (38%)                | 2 (50%)               |
|                      | N with imputed Score | 1                    | 1                      | 0                     |

*For subjects who died before the evaluation day (and so are assumed to have a worse outcome than other surviving subjects) a Score of 99 is imputed*

*For subjects who were on ECMO on the evaluation day (and so are assumed to have a worse outcome than other surviving subjects but better outcome than non-surviving subjects) a Score of 98 is imputed*

*For other surviving subjects with a missing Score, the Score was imputed with the last available Score carried forward*

**Supplemental Table 6: Concomittant antiviral use**

| Antiviral                 | Total<br>(N=138) | Randomized treatment |                     |
|---------------------------|------------------|----------------------|---------------------|
|                           |                  | High titer<br>(N=91) | Low titer<br>(N=47) |
| Oseltamivir               | 123 (89%)        | 81 (89%)             | 42 (89%)            |
| Oseltamivir + Peramivir   | 3 (2%)           | 2 (2%)               | 1 (2%)              |
| Oseltamivir + Rimantadine | 1 (1%)           | 0 (0%)               | 1 (2%)              |
| Peramivir                 | 2 (1%)           | 1 (1%)               | 1 (2%)              |
| None                      | 9 (7%)           | 7 (8%)               | 2 (4%)              |



**Supplemental Table 7: Total number of Serious Adverse Events (SAEs) by MedDRA System Organ Class (SOC) and Preferred Term (PT) after randomization, including SAEs reported after the Day 28 visit.**

| Event                                                  | Total (N=88) |         |         |         |         |               |         |         |         |         | Randomized treatment |               |         |         |         |         |         |               |    |     |   |     |    |      |   |    |   |    |   |     |    |     |   |     |    |      |
|--------------------------------------------------------|--------------|---------|---------|---------|---------|---------------|---------|---------|---------|---------|----------------------|---------------|---------|---------|---------|---------|---------|---------------|----|-----|---|-----|----|------|---|----|---|----|---|-----|----|-----|---|-----|----|------|
|                                                        | Grade 1      | Grade 2 | Grade 3 | Grade 4 | Grade 5 | Number events | Grade 1 | Grade 2 | Grade 3 | Grade 4 | Grade 5              | Number events | Grade 1 | Grade 2 | Grade 3 | Grade 4 | Grade 5 | Number events |    |     |   |     |    |      |   |    |   |    |   |     |    |     |   |     |    |      |
| <b>Overall</b>                                         | 1            | 1%      | 2       | 2%      | 34      | 38%           | 38      | 43%     | 13      | 15%     | 88                   | 100%          | 0       | 0%      | 0       | 0%      | 27      | 45%           | 25 | 42% | 8 | 13% | 60 | 100% | 1 | 4% | 2 | 7% | 7 | 25% | 13 | 46% | 5 | 18% | 28 | 100% |
| <b>RESPIRATORY, THORACIC AND MEDIASTINAL DISORDERS</b> | 0            | 0%      | 0       | 0%      | 7       | 8%            | 11      | 13%     | 5       | 6%      | 23                   | 26%           | 0       | 0%      | 0       | 0%      | 6       | 10%           | 8  | 13% | 2 | 3%  | 16 | 27%  | 0 | 0% | 0 | 0% | 1 | 4%  | 3  | 11% | 3 | 11% | 7  | 25%  |
| ACUTE RESPIRATORY DISTRESS SYNDROME                    | 0            | 0%      | 0       | 0%      | 1       | 1%            | 3       | 3%      | 2       | 2%      | 6                    | 7%            | 0       | 0%      | 0       | 0%      | 1       | 2%            | 3  | 5%  | 0 | 0%  | 4  | 7%   | 0 | 0% | 0 | 0% | 0 | 0%  | 0  | 0%  | 2 | 7%  | 2  | 7%   |
| RESPIRATORY DISTRESS                                   | 0            | 0%      | 0       | 0%      | 1       | 1%            | 2       | 2%      | 0       | 0%      | 3                    | 3%            | 0       | 0%      | 0       | 0%      | 1       | 2%            | 2  | 3%  | 0 | 0%  | 3  | 5%   | 0 | 0% | 0 | 0% | 0 | 0%  | 0  | 0%  | 0 | 0%  | 0  | 0%   |
| HAEMOTHORAX                                            | 0            | 0%      | 0       | 0%      | 0       | 0%            | 2       | 2%      | 0       | 0%      | 2                    | 2%            | 0       | 0%      | 0       | 0%      | 0       | 0%            | 1  | 2%  | 0 | 0%  | 1  | 2%   | 0 | 0% | 0 | 0% | 0 | 0%  | 1  | 4%  | 0 | 0%  | 1  | 4%   |
| PNEUMONIA ASPIRATION                                   | 0            | 0%      | 0       | 0%      | 1       | 1%            | 0       | 0%      | 1       | 1%      | 2                    | 2%            | 0       | 0%      | 0       | 0%      | 1       | 2%            | 0  | 0%  | 0 | 0%  | 1  | 2%   | 0 | 0% | 0 | 0% | 0 | 0%  | 0  | 0%  | 1 | 4%  | 1  | 4%   |
| RESPIRATORY FAILURE                                    | 0            | 0%      | 0       | 0%      | 0       | 0%            | 1       | 1%      | 1       | 1%      | 2                    | 2%            | 0       | 0%      | 0       | 0%      | 0       | 0%            | 1  | 2%  | 1 | 2%  | 1  | 2%   | 0 | 0% | 0 | 0% | 0 | 0%  | 1  | 4%  | 0 | 0%  | 1  | 4%   |
| HYPOXIA                                                | 0            | 0%      | 0       | 0%      | 1       | 1%            | 1       | 1%      | 0       | 0%      | 2                    | 2%            | 0       | 0%      | 0       | 0%      | 1       | 2%            | 0  | 0%  | 0 | 0%  | 2  | 3%   | 0 | 0% | 0 | 0% | 0 | 0%  | 0  | 0%  | 0 | 0%  | 0  | 0%   |
| DYSPNOEA                                               | 0            | 0%      | 0       | 0%      | 1       | 1%            | 1       | 1%      | 0       | 0%      | 2                    | 2%            | 0       | 0%      | 0       | 0%      | 1       | 2%            | 0  | 0%  | 0 | 0%  | 1  | 2%   | 0 | 0% | 0 | 0% | 0 | 0%  | 1  | 4%  | 0 | 0%  | 1  | 4%   |
| PNEUMOTHORAX                                           | 0            | 0%      | 0       | 0%      | 1       | 1%            | 1       | 1%      | 0       | 0%      | 2                    | 2%            | 0       | 0%      | 0       | 0%      | 1       | 2%            | 1  | 2%  | 0 | 0%  | 2  | 3%   | 0 | 0% | 0 | 0% | 0 | 0%  | 0  | 0%  | 0 | 0%  | 0  | 0%   |
| ACUTE RESPIRATORY FAILURE                              | 0            | 0%      | 0       | 0%      | 0       | 0%            | 0       | 0%      | 1       | 1%      | 1                    | 1%            | 0       | 0%      | 0       | 0%      | 0       | 0%            | 1  | 2%  | 1 | 2%  | 1  | 2%   | 0 | 0% | 0 | 0% | 0 | 0%  | 0  | 0%  | 0 | 0%  | 0  | 0%   |
| CHRONIC OBSTRUCTIVE PULMONARY DISEASE                  | 0            | 0%      | 0       | 0%      | 1       | 1%            | 0       | 0%      | 1       | 1%      | 1                    | 1%            | 0       | 0%      | 0       | 0%      | 0       | 0%            | 0  | 0%  | 0 | 0%  | 0  | 0%   | 0 | 0% | 0 | 0% | 1 | 4%  | 0  | 0%  | 0 | 0%  | 1  | 4%   |
| <b>CARDIAC DISORDERS</b>                               | 0            | 0%      | 0       | 0%      | 5       | 6%            | 5       | 6%      | 2       | 2%      | 12                   | 14%           | 0       | 0%      | 0       | 0%      | 5       | 8%            | 3  | 5%  | 2 | 3%  | 10 | 17%  | 0 | 0% | 0 | 0% | 2 | 7%  | 0  | 0%  | 2 | 7%  |    |      |
| CARDIOMYOPATHY                                         | 0            | 0%      | 0       | 0%      | 1       | 1%            | 1       | 1%      | 0       | 0%      | 2                    | 2%            | 0       | 0%      | 0       | 0%      | 1       | 2%            | 0  | 0%  | 0 | 0%  | 1  | 2%   | 0 | 0% | 0 | 0% | 0 | 0%  | 1  | 4%  | 0 | 0%  | 1  | 4%   |
| ATRIAL FIBRILLATION                                    | 0            | 0%      | 0       | 0%      | 1       | 1%            | 1       | 1%      | 0       | 0%      | 2                    | 2%            | 0       | 0%      | 0       | 0%      | 1       | 2%            | 1  | 2%  | 0 | 0%  | 2  | 3%   | 0 | 0% | 0 | 0% | 0 | 0%  | 0  | 0%  | 0 | 0%  | 0  | 0%   |
| PERICARDIAL HAEMORRHAGE                                | 0            | 0%      | 0       | 0%      | 0       | 0%            | 1       | 1%      | 0       | 0%      | 1                    | 1%            | 0       | 0%      | 0       | 0%      | 0       | 0%            | 0  | 0%  | 0 | 0%  | 0  | 0%   | 0 | 0% | 0 | 0% | 0 | 0%  | 1  | 4%  | 0 | 0%  | 1  | 4%   |
| CARDIOPULMONARY FAILURE                                | 0            | 0%      | 0       | 0%      | 0       | 0%            | 0       | 0%      | 1       | 1%      | 1                    | 1%            | 0       | 0%      | 0       | 0%      | 0       | 0%            | 1  | 2%  | 1 | 2%  | 1  | 2%   | 0 | 0% | 0 | 0% | 0 | 0%  | 0  | 0%  | 0 | 0%  | 0  | 0%   |
| CARDIAC ARREST                                         | 0            | 0%      | 0       | 0%      | 0       | 0%            | 0       | 0%      | 1       | 1%      | 1                    | 1%            | 0       | 0%      | 0       | 0%      | 0       | 0%            | 1  | 2%  | 1 | 2%  | 1  | 2%   | 0 | 0% | 0 | 0% | 0 | 0%  | 0  | 0%  | 0 | 0%  | 0  | 0%   |
| CARDIAC FAILURE                                        | 0            | 0%      | 0       | 0%      | 1       | 1%            | 0       | 0%      | 0       | 0%      | 1                    | 1%            | 0       | 0%      | 0       | 0%      | 1       | 2%            | 0  | 0%  | 0 | 0%  | 1  | 2%   | 0 | 0% | 0 | 0% | 0 | 0%  | 0  | 0%  | 0 | 0%  | 0  | 0%   |
| ATRIAL FLUTTER                                         | 0            | 0%      | 0       | 0%      | 1       | 1%            | 0       | 0%      | 0       | 0%      | 1                    | 1%            | 0       | 0%      | 0       | 0%      | 1       | 2%            | 0  | 0%  | 0 | 0%  | 1  | 2%   | 0 | 0% | 0 | 0% | 0 | 0%  | 0  | 0%  | 0 | 0%  | 0  | 0%   |
| SUPRAVENTRICULAR TACHYCARDIA                           | 0            | 0%      | 0       | 0%      | 1       | 1%            | 0       | 0%      | 0       | 0%      | 1                    | 1%            | 0       | 0%      | 0       | 0%      | 1       | 2%            | 0  | 0%  | 0 | 0%  | 1  | 2%   | 0 | 0% | 0 | 0% | 0 | 0%  | 0  | 0%  | 0 | 0%  | 0  | 0%   |
| PERICARDIAL EFFUSION                                   | 0            | 0%      | 0       | 0%      | 0       | 0%            | 1       | 1%      | 0       | 0%      | 1                    | 1%            | 0       | 0%      | 0       | 0%      | 1       | 2%            | 0  | 0%  | 1 | 2%  | 1  | 2%   | 0 | 0% | 0 | 0% | 0 | 0%  | 0  | 0%  | 0 | 0%  | 0  | 0%   |
| VENTRICULAR TACHYCARDIA                                | 0            | 0%      | 0       | 0%      | 0       | 0%            | 1       | 1%      | 0       | 0%      | 1                    | 1%            | 0       | 0%      | 0       | 0%      | 1       | 2%            | 0  | 0%  | 1 | 2%  | 1  | 2%   | 0 | 0% | 0 | 0% | 0 | 0%  | 0  | 0%  | 0 | 0%  | 0  | 0%   |
| <b>INFECTIONS AND INFESTATIONS</b>                     | 1            | 1%      | 0       | 0%      | 4       | 5%            | 2       | 2%      | 1       | 1%      | 8                    | 9%            | 0       | 0%      | 0       | 0%      | 4       | 7%            | 0  | 0%  | 1 | 2%  | 5  | 8%   | 1 | 4% | 0 | 0% | 0 | 0%  | 2  | 7%  | 0 | 0%  | 3  | 11%  |
| UROSEPSIS                                              | 0            | 0%      | 0       | 0%      | 1       | 1%            | 0       | 0%      | 0       | 0%      | 1                    | 1%            | 0       | 0%      | 0       | 0%      | 1       | 2%            | 0  | 0%  | 0 | 0%  | 1  | 2%   | 0 | 0% | 0 | 0% | 0 | 0%  | 0  | 0%  | 0 | 0%  | 0  | 0%   |
| SINUSITIS                                              | 0            | 0%      | 0       | 0%      | 1       | 1%            | 0       | 0%      | 0       | 0%      | 1                    | 1%            | 0       | 0%      | 0       | 0%      | 1       | 2%            | 0  | 0%  | 0 | 0%  | 1  | 2%   | 0 | 0% | 0 | 0% | 0 | 0%  | 0  | 0%  | 0 | 0%  | 0  | 0%   |
| GASTROENTERITIS NOROVIRUS                              | 0            | 0%      | 0       | 0%      | 1       | 1%            | 0       | 0%      | 0       | 0%      | 1                    | 1%            | 0       | 0%      | 0       | 0%      | 1       | 2%            | 0  | 0%  | 0 | 0%  | 1  | 2%   | 0 | 0% | 0 | 0% | 0 | 0%  | 0  | 0%  | 0 | 0%  | 0  | 0%   |
| TRACHEITIS                                             | 1            | 1%      | 0       | 0%      | 0       | 0%            | 0       | 0%      | 0       | 0%      | 1                    | 1%            | 0       | 0%      | 0       | 0%      | 0       | 0%            | 0  | 0%  | 0 | 0%  | 0  | 0%   | 1 | 4% | 0 | 0% | 0 | 0%  | 0  | 0%  | 0 | 0%  | 1  | 4%   |
| SYSTEMIC CANDIDA                                       | 0            | 0%      | 0       | 0%      | 0       | 0%            | 1       | 1%      | 0       | 0%      | 1                    | 1%            | 0       | 0%      | 0       | 0%      | 0       | 0%            | 0  | 0%  | 0 | 0%  | 0  | 0%   | 0 | 0% | 0 | 0% | 0 | 0%  | 1  | 4%  | 0 | 0%  | 1  | 4%   |
| SEPTIC SHOCK                                           | 0            | 0%      | 0       | 0%      | 0       | 0%            | 0       | 0%      | 1       | 1%      | 1                    | 1%            | 0       | 0%      | 0       | 0%      | 1       | 2%            | 1  | 2%  | 0 | 0%  | 2  | 3%   | 0 | 0% | 0 | 0% | 0 | 0%  | 0  | 0%  | 0 | 0%  | 0  | 0%   |
| PNEUMONIA                                              | 0            | 0%      | 0       | 0%      | 1       | 1%            | 0       | 0%      | 0       | 0%      | 1                    | 1%            | 0       | 0%      | 0       | 0%      | 1       | 2%            | 0  | 0%  | 0 | 0%  | 1  | 2%   | 0 | 0% | 0 | 0% | 0 | 0%  | 0  | 0%  | 0 | 0%  | 0  | 0%   |
| SEPSIS                                                 | 0            | 0%      | 0       | 0%      | 0       | 0%            | 1       | 1%      | 0       | 0%      | 1                    | 1%            | 0       | 0%      | 0       | 0%      | 0       | 0%            | 0  | 0%  | 0 | 0%  | 0  | 0%   | 0 | 0% | 0 | 0% | 0 | 0%  | 1  | 4%  | 0 | 0%  | 1  | 4%   |
| <b>INVESTIGATIONS</b>                                  | 0            | 0%      | 0       | 0%      | 2       | 2%            | 6       | 7%      | 0       | 0%      | 8                    | 9%            | 0       | 0%      | 0       | 0%      | 1       | 2%            | 4  | 7%  | 0 | 0%  | 5  | 8%   | 0 | 0% | 0 | 0% | 1 | 4%  | 2  | 7%  | 0 | 0%  | 3  | 11%  |
| HAEMOGLOBIN DECREASED                                  | 0            | 0%      | 0       | 0%      | 1       | 1%            | 1       | 1%      | 0       | 0%      | 2                    | 2%            | 0       | 0%      | 0       | 0%      | 1       | 2%            | 0  | 0%  | 1 | 2%  | 1  | 2%   | 0 | 0% | 0 | 0% | 1 | 4%  | 0  | 0%  | 0 | 0%  | 1  | 4%   |
| BLOOD CREATININE INCREASED                             | 0            | 0%      | 0       | 0%      | 0       | 0%            | 1       | 1%      | 0       | 0%      | 1                    | 1%            | 0       | 0%      | 0       | 0%      | 1       | 2%            | 0  | 0%  | 1 | 2%  | 1  | 2%   | 0 | 0% | 0 | 0% | 0 | 0%  | 0  | 0%  | 0 | 0%  | 0  | 0%   |
| CREATININE RENAL CLEARANCE DECREASED                   | 0            | 0%      | 0       | 0%      | 0       | 0%            | 1       | 1%      | 0       | 0%      | 1                    | 1%            | 0       | 0%      | 0       | 0%      | 1       | 2%            | 0  | 0%  | 1 | 2%  | 1  | 2%   | 0 | 0% | 0 | 0% | 0 | 0%  | 0  | 0%  | 0 | 0%  | 0  | 0%   |
| LIVER FUNCTION TEST ABNORMAL                           | 0            | 0%      | 0       | 0%      | 0       | 0%            | 1       | 1%      | 0       | 0%      | 1                    | 1%            | 0       | 0%      | 0       | 0%      | 1       | 2%            | 0  | 0%  | 1 | 2%  | 1  | 2%   | 0 | 0% | 0 | 0% | 0 | 0%  | 0  | 0%  | 0 | 0%  | 0  | 0%   |
| WHITE BLOOD CELL COUNT DECREASED                       | 0            | 0%      | 0       | 0%      | 0       | 0%            | 1       | 1%      | 0       | 0%      | 1                    | 1%            | 0       | 0%      | 0       | 0%      | 0       | 0%            | 0  | 0%  | 0 | 0%  | 0  | 0%   | 0 | 0% | 0 | 0% | 0 | 0%  | 1  | 4%  | 0 | 0%  | 1  | 4%   |
| PLATELET COUNT DECREASED                               | 0            | 0%      | 0       | 0%      | 0       | 0%            | 1       | 1%      | 0       | 0%      | 1                    | 1%            | 0       | 0%      | 0       | 0%      | 0       | 0%            | 0  | 0%  | 0 | 0%  | 0  | 0%   | 0 | 0% | 0 | 0% | 0 | 0%  | 1  | 4%  | 0 | 0%  | 1  | 4%   |
| BLOOD POTASSIUM DECREASED                              | 0            | 0%      | 0       | 0%      | 1       | 1%            | 0       | 0%      | 0       | 0%      | 1                    | 1%            | 0       | 0%      | 0       | 0%      | 1       | 2%            | 0  | 0%  | 0 | 0%  | 1  | 2%   | 0 | 0% | 0 | 0% | 0 | 0%  | 0  | 0%  | 0 | 0%  | 0  | 0%   |
| <b>INJURY, POISONING AND PROCEDURAL COMPLICATIONS</b>  | 0            | 0%      | 2       | 2%      | 3       | 3%            | 2       | 2%      | 0       | 0%      | 7                    | 8%            | 0       | 0%      | 0       | 0%      | 3       | 5%            | 1  | 2%  | 0 | 0%  | 4  | 7%   | 0 | 0% | 2 | 7% | 0 | 0%  | 1  | 4%  | 0 | 0%  | 3  | 11%  |
| ALLERGIC TRANSFUSION REACTION                          | 0            | 0%      | 1       | 1%      | 2       | 2%            | 1       | 1%      | 0       | 0%      | 4                    | 5%            | 0       | 0%      | 0       | 0%      | 2       | 3%            | 0  | 0%  | 0 | 0%  | 2  | 3%   | 0 | 0% | 1 | 4% | 0 | 0%  | 1  | 4%  | 0 | 0%  | 2  | 7%   |
| TOXICITY TO VARIOUS AGENTS                             | 0            | 0%      | 0       | 0%      | 1       | 1%            | 0       | 0%      | 0       | 0%      | 1                    | 1%            | 0       | 0%      | 0       | 0%      | 1       | 2%            | 0  | 0%  | 0 | 0%  | 1  | 2%   | 0 | 0% | 0 | 0% | 0 | 0%  | 0  | 0%  | 0 | 0%  | 0  | 0%   |
| TRAUMATIC LIVER INJURY                                 | 0            | 0%      | 0       | 0%      | 0       | 0%            | 1       | 1%      | 0       | 0%      | 1                    | 1%            | 0       | 0%      | 0       | 0%      | 1       | 2%            | 0  | 0%  | 1 | 2%  | 1  | 2%   | 0 | 0% | 0 |    |   |     |    |     |   |     |    |      |

**Supplemental Table 8: Total number of Adverse Events (AEs) by MedDRA System Organ Class (SOC) and Preferred Term (PT) after randomization \***

| Event                                                  | High<br>titer<br>(N=126) |         |         |         |         |               | Low<br>titer<br>(N=57) |         |         |         |         |               |   |    |   |     |    |     |    |     |   |    |    |      |
|--------------------------------------------------------|--------------------------|---------|---------|---------|---------|---------------|------------------------|---------|---------|---------|---------|---------------|---|----|---|-----|----|-----|----|-----|---|----|----|------|
|                                                        | Grade 1                  | Grade 2 | Grade 3 | Grade 4 | Grade 5 | Number events | Grade 1                | Grade 2 | Grade 3 | Grade 4 | Grade 5 | Number events |   |    |   |     |    |     |    |     |   |    |    |      |
| <b>Overall</b>                                         | 3                        | 2%      | 0       | 0%      | 85      | 67%           | 32                     | 25%     | 6       | 5%      | 126     | 100%          | 1 | 2% | 7 | 12% | 28 | 49% | 16 | 28% | 5 | 9% | 57 | 100% |
| <b>INVESTIGATIONS</b>                                  | 0                        | 0%      | 0       | 0%      | 23      | 18%           | 8                      | 6%      | 0       | 0%      | 31      | 25%           | 0 | 0% | 0 | 0%  | 6  | 11% | 3  | 5%  | 0 | 0% | 9  | 16%  |
| HAEMOGLOBIN DECREASED                                  | 0                        | 0%      | 0       | 0%      | 4       | 3%            | 1                      | 1%      | 0       | 0%      | 5       | 4%            | 0 | 0% | 0 | 0%  | 1  | 2%  | 0  | 0%  | 0 | 0% | 1  | 2%   |
| ASPARTATE AMINOTRANSFERASE INCREASED                   | 0                        | 0%      | 0       | 0%      | 1       | 1%            | 1                      | 1%      | 0       | 0%      | 2       | 2%            | 0 | 0% | 0 | 0%  | 1  | 2%  | 0  | 0%  | 0 | 0% | 1  | 2%   |
| BLOOD GLUCOSE INCREASED                                | 0                        | 0%      | 0       | 0%      | 2       | 2%            | 0                      | 0%      | 0       | 0%      | 2       | 2%            | 0 | 0% | 0 | 0%  | 1  | 2%  | 0  | 0%  | 0 | 0% | 1  | 2%   |
| WHITE BLOOD CELL COUNT INCREASED                       | 0                        | 0%      | 0       | 0%      | 2       | 2%            | 1                      | 1%      | 0       | 0%      | 3       | 2%            | 0 | 0% | 0 | 0%  | 0  | 0%  | 0  | 0%  | 0 | 0% | 0  | 0%   |
| BLOOD CREATININE INCREASED                             | 0                        | 0%      | 0       | 0%      | 0       | 0%            | 1                      | 1%      | 0       | 0%      | 1       | 1%            | 0 | 0% | 0 | 0%  | 1  | 2%  | 0  | 0%  | 0 | 0% | 1  | 2%   |
| BLOOD POTASSIUM DECREASED                              | 0                        | 0%      | 0       | 0%      | 2       | 2%            | 0                      | 0%      | 0       | 0%      | 2       | 2%            | 0 | 0% | 0 | 0%  | 0  | 0%  | 0  | 0%  | 0 | 0% | 0  | 0%   |
| HAEMATOCRIT DECREASED                                  | 0                        | 0%      | 0       | 0%      | 2       | 2%            | 0                      | 0%      | 0       | 0%      | 2       | 2%            | 0 | 0% | 0 | 0%  | 0  | 0%  | 0  | 0%  | 0 | 0% | 0  | 0%   |
| LYMPHOCYTE COUNT DECREASED                             | 0                        | 0%      | 0       | 0%      | 1       | 1%            | 0                      | 0%      | 0       | 0%      | 1       | 1%            | 0 | 0% | 0 | 0%  | 1  | 2%  | 0  | 0%  | 0 | 0% | 1  | 2%   |
| CREATININE RENAL CLEARANCE DECREASED                   | 0                        | 0%      | 0       | 0%      | 0       | 0%            | 1                      | 1%      | 0       | 0%      | 1       | 1%            | 0 | 0% | 0 | 0%  | 0  | 0%  | 0  | 0%  | 0 | 0% | 0  | 0%   |
| BLOOD TRIGLYCERIDES INCREASED                          | 0                        | 0%      | 0       | 0%      | 1       | 1%            | 0                      | 0%      | 0       | 0%      | 1       | 1%            | 0 | 0% | 0 | 0%  | 0  | 0%  | 0  | 0%  | 0 | 0% | 0  | 0%   |
| BLOOD CALCIUM DECREASED                                | 0                        | 0%      | 0       | 0%      | 0       | 0%            | 1                      | 1%      | 0       | 0%      | 1       | 1%            | 0 | 0% | 0 | 0%  | 0  | 0%  | 0  | 0%  | 0 | 0% | 0  | 0%   |
| TROPONIN INCREASED                                     | 0                        | 0%      | 0       | 0%      | 0       | 0%            | 0                      | 0%      | 0       | 0%      | 0       | 0%            | 0 | 0% | 0 | 0%  | 0  | 0%  | 1  | 2%  | 0 | 0% | 1  | 2%   |
| BLOOD BILIRUBIN INCREASED                              | 0                        | 0%      | 0       | 0%      | 0       | 0%            | 0                      | 0%      | 0       | 0%      | 0       | 0%            | 0 | 0% | 0 | 0%  | 1  | 2%  | 0  | 0%  | 0 | 0% | 1  | 2%   |
| ANION GAP INCREASED                                    | 0                        | 0%      | 0       | 0%      | 1       | 1%            | 0                      | 0%      | 0       | 0%      | 1       | 1%            | 0 | 0% | 0 | 0%  | 0  | 0%  | 0  | 0%  | 0 | 0% | 0  | 0%   |
| LIVER FUNCTION TEST ABNORMAL                           | 0                        | 0%      | 0       | 0%      | 0       | 0%            | 1                      | 1%      | 0       | 0%      | 1       | 1%            | 0 | 0% | 0 | 0%  | 0  | 0%  | 0  | 0%  | 0 | 0% | 0  | 0%   |
| BLOOD BICARBONATE DECREASED                            | 0                        | 0%      | 0       | 0%      | 1       | 1%            | 0                      | 0%      | 0       | 0%      | 1       | 1%            | 0 | 0% | 0 | 0%  | 0  | 0%  | 0  | 0%  | 0 | 0% | 0  | 0%   |
| TROPONIN T INCREASED                                   | 0                        | 0%      | 0       | 0%      | 1       | 1%            | 0                      | 0%      | 0       | 0%      | 1       | 1%            | 0 | 0% | 0 | 0%  | 0  | 0%  | 0  | 0%  | 0 | 0% | 0  | 0%   |
| PROTHROMBIN TIME PROLONGED                             | 0                        | 0%      | 0       | 0%      | 1       | 1%            | 0                      | 0%      | 0       | 0%      | 1       | 1%            | 0 | 0% | 0 | 0%  | 0  | 0%  | 0  | 0%  | 0 | 0% | 0  | 0%   |
| EPIDERMAL GROWTH FACTOR RECEPTOR DECREASED             | 0                        | 0%      | 0       | 0%      | 1       | 1%            | 0                      | 0%      | 0       | 0%      | 1       | 1%            | 0 | 0% | 0 | 0%  | 0  | 0%  | 0  | 0%  | 0 | 0% | 0  | 0%   |
| BLOOD ALBUMIN DECREASED                                | 0                        | 0%      | 0       | 0%      | 1       | 1%            | 0                      | 0%      | 0       | 0%      | 1       | 1%            | 0 | 0% | 0 | 0%  | 0  | 0%  | 0  | 0%  | 0 | 0% | 0  | 0%   |
| BLOOD PHOSPHORUS DECREASED                             | 0                        | 0%      | 0       | 0%      | 1       | 1%            | 0                      | 0%      | 0       | 0%      | 1       | 1%            | 0 | 0% | 0 | 0%  | 0  | 0%  | 0  | 0%  | 0 | 0% | 0  | 0%   |
| WHITE BLOOD CELL COUNT DECREASED                       | 0                        | 0%      | 0       | 0%      | 0       | 0%            | 0                      | 0%      | 0       | 0%      | 0       | 0%            | 0 | 0% | 0 | 0%  | 0  | 0%  | 1  | 2%  | 0 | 0% | 1  | 2%   |
| PLATELET COUNT DECREASED                               | 0                        | 0%      | 0       | 0%      | 0       | 0%            | 0                      | 0%      | 0       | 0%      | 0       | 0%            | 0 | 0% | 0 | 0%  | 0  | 0%  | 1  | 2%  | 0 | 0% | 1  | 2%   |
| ALANINE AMINOTRANSFERASE INCREASED                     | 0                        | 0%      | 0       | 0%      | 0       | 0%            | 1                      | 1%      | 0       | 0%      | 1       | 1%            | 0 | 0% | 0 | 0%  | 0  | 0%  | 0  | 0%  | 0 | 0% | 0  | 0%   |
| NEUTROPHIL COUNT INCREASED                             | 0                        | 0%      | 0       | 0%      | 1       | 1%            | 0                      | 0%      | 0       | 0%      | 1       | 1%            | 0 | 0% | 0 | 0%  | 0  | 0%  | 0  | 0%  | 0 | 0% | 0  | 0%   |
| <b>RESPIRATORY, THORACIC AND MEDIASTINAL DISORDERS</b> | 0                        | 0%      | 0       | 0%      | 8       | 6%            | 8                      | 6%      | 2       | 2%      | 18      | 14%           | 0 | 0% | 1 | 2%  | 4  | 7%  | 3  | 5%  | 3 | 5% | 11 | 19%  |
| ACUTE RESPIRATORY DISTRESS SYNDROME                    | 0                        | 0%      | 0       | 0%      | 1       | 1%            | 3                      | 2%      | 0       | 0%      | 4       | 3%            | 0 | 0% | 0 | 0%  | 1  | 2%  | 0  | 0%  | 2 | 4% | 3  | 5%   |
| RESPIRATORY FAILURE                                    | 0                        | 0%      | 0       | 0%      | 0       | 0%            | 0                      | 0%      | 1       | 1%      | 1       | 1%            | 0 | 0% | 0 | 0%  | 1  | 2%  | 1  | 2%  | 0 | 0% | 2  | 4%   |
| RESPIRATORY DISTRESS                                   | 0                        | 0%      | 0       | 0%      | 1       | 1%            | 2                      | 2%      | 0       | 0%      | 3       | 2%            | 0 | 0% | 0 | 0%  | 0  | 0%  | 0  | 0%  | 0 | 0% | 0  | 0%   |
| HYPOXIA                                                | 0                        | 0%      | 0       | 0%      | 2       | 2%            | 1                      | 1%      | 0       | 0%      | 3       | 2%            | 0 | 0% | 0 | 0%  | 0  | 0%  | 0  | 0%  | 0 | 0% | 0  | 0%   |
| HAEMOTHORAX                                            | 0                        | 0%      | 0       | 0%      | 0       | 0%            | 1                      | 1%      | 0       | 0%      | 1       | 1%            | 0 | 0% | 0 | 0%  | 0  | 0%  | 1  | 2%  | 0 | 0% | 1  | 2%   |
| PNEUMONIA ASPIRATION                                   | 0                        | 0%      | 0       | 0%      | 1       | 1%            | 0                      | 0%      | 0       | 0%      | 1       | 1%            | 0 | 0% | 0 | 0%  | 0  | 0%  | 0  | 0%  | 1 | 2% | 1  | 2%   |
| DYSPNOEA                                               | 0                        | 0%      | 0       | 0%      | 1       | 1%            | 0                      | 0%      | 0       | 0%      | 1       | 1%            | 0 | 0% | 0 | 0%  | 0  | 0%  | 1  | 2%  | 0 | 0% | 1  | 2%   |
| PNEUMOTHORAX                                           | 0                        | 0%      | 0       | 0%      | 1       | 1%            | 1                      | 1%      | 0       | 0%      | 2       | 2%            | 0 | 0% | 0 | 0%  | 0  | 0%  | 0  | 0%  | 0 | 0% | 0  | 0%   |
| WHEEZING                                               | 0                        | 0%      | 0       | 0%      | 1       | 1%            | 0                      | 0%      | 0       | 0%      | 1       | 1%            | 0 | 0% | 0 | 0%  | 0  | 0%  | 0  | 0%  | 0 | 0% | 0  | 0%   |
| EPISTAXIS                                              | 0                        | 0%      | 0       | 0%      | 0       | 0%            | 0                      | 0%      | 0       | 0%      | 0       | 0%            | 0 | 0% | 1 | 2%  | 0  | 0%  | 0  | 0%  | 0 | 0% | 1  | 2%   |
| ACUTE RESPIRATORY FAILURE                              | 0                        | 0%      | 0       | 0%      | 0       | 0%            | 0                      | 0%      | 1       | 1%      | 1       | 1%            | 0 | 0% | 0 | 0%  | 0  | 0%  | 0  | 0%  | 0 | 0% | 0  | 0%   |
| CHRONIC OBSTRUCTIVE PULMONARY DISEASE                  | 0                        | 0%      | 0       | 0%      | 0       | 0%            | 0                      | 0%      | 0       | 0%      | 0       | 0%            | 0 | 0% | 0 | 0%  | 1  | 2%  | 0  | 0%  | 0 | 0% | 1  | 2%   |
| PLEURAL EFFUSION                                       | 0                        | 0%      | 0       | 0%      | 0       | 0%            | 0                      | 0%      | 0       | 0%      | 0       | 0%            | 0 | 0% | 0 | 0%  | 1  | 2%  | 0  | 0%  | 0 | 0% | 1  | 2%   |
| <b>METABOLISM AND NUTRITION DISORDERS</b>              | 1                        | 1%      | 0       | 0%      | 13      | 10%           | 2                      | 2%      | 0       | 0%      | 16      | 13%           | 0 | 0% | 0 | 0%  | 3  | 5%  | 2  | 4%  | 0 | 0% | 5  | 9%   |
| HYPOKALAEMIA                                           | 1                        | 1%      | 0       | 0%      | 4       | 3%            | 0                      | 0%      | 0       | 0%      | 5       | 4%            | 0 | 0% | 0 | 0%  | 0  | 0%  | 0  | 0%  | 0 | 0% | 0  | 0%   |
| FLUID OVERLOAD                                         | 0                        | 0%      | 0       | 0%      | 3       | 2%            | 0                      | 0%      | 0       | 0%      | 3       | 2%            | 0 | 0% | 0 | 0%  | 0  | 0%  | 0  | 0%  | 0 | 0% | 0  | 0%   |
| HYPOGLYCAEMIA                                          | 0                        | 0%      | 0       | 0%      | 1       | 1%            | 0                      | 0%      | 0       | 0%      | 1       | 1%            | 0 | 0% | 0 | 0%  | 1  | 2%  | 0  | 0%  | 0 | 0% | 1  | 2%   |
| METABOLIC ACIDOSIS                                     | 0                        | 0%      | 0       | 0%      | 0       | 0%            | 1                      | 1%      | 0       | 0%      | 1       | 1%            | 0 | 0% | 0 | 0%  | 0  | 0%  | 1  | 2%  | 0 | 0% | 1  | 2%   |
| HYPOPHOSPHATAEMIA                                      | 0                        | 0%      | 0       | 0%      | 1       | 1%            | 0                      | 0%      | 0       | 0%      | 1       | 1%            | 0 | 0% | 0 | 0%  | 1  | 2%  | 0  | 0%  | 0 | 0% | 1  | 2%   |
| VITAMIN D DEFICIENCY                                   | 0                        | 0%      | 0       | 0%      | 1       | 1%            | 0                      | 0%      | 0       | 0%      | 1       | 1%            | 0 | 0% | 0 | 0%  | 0  | 0%  | 0  | 0%  | 0 | 0% | 0  | 0%   |
| HYPERGLYCAEMIA                                         | 0                        | 0%      | 0       | 0%      | 1       | 1%            | 0                      | 0%      | 0       | 0%      | 1       | 1%            | 0 | 0% | 0 | 0%  | 0  | 0%  | 0  | 0%  | 0 | 0% | 0  | 0%   |
| HYPERKALAEMIA                                          | 0                        | 0%      | 0       | 0%      | 1       | 1%            | 0                      | 0%      | 0       | 0%      | 1       | 1%            | 0 | 0% | 0 | 0%  | 0  | 0%  | 0  | 0%  | 0 | 0% | 0  | 0%   |
| ACIDOSIS                                               | 0                        | 0%      | 0       | 0%      | 0       | 0%            | 0                      | 0%      | 0       | 0%      | 0       | 0%            | 0 | 0% | 0 | 0%  | 0  | 0%  | 1  | 2%  | 0 | 0% | 1  | 2%   |
| HYPERTRIGLYCERIDAEMIA                                  | 0                        | 0%      | 0       | 0%      | 0       | 0%            | 0                      | 0%      | 0       | 0%      | 0       | 0%            | 0 | 0% | 0 | 0%  | 1  | 2%  | 0  | 0%  | 0 | 0% | 1  | 2%   |
| LACTIC ACIDOSIS                                        | 0                        | 0%      | 0       | 0%      | 0       | 0%            | 1                      | 1%      | 0       | 0%      | 1       | 1%            | 0 | 0% | 0 | 0%  | 0  | 0%  | 0  | 0%  | 0 | 0% | 0  | 0%   |
| HYPERNATRAEMIA                                         | 0                        | 0%      | 0       | 0%      | 1       | 1%            | 0                      | 0%      | 0       | 0%      | 1       | 1%            | 0 | 0% | 0 | 0%  | 0  | 0%  | 0  | 0%  | 0 | 0% | 0  | 0%   |
| <b>CARDIAC DISORDERS</b>                               | 0                        | 0%      | 0       | 0%      | 9       | 7%            | 3                      | 2%      | 1       | 1%      | 13      | 10%           | 0 | 0% | 0 | 0%  | 0  | 0%  | 2  | 4%  | 0 | 0% | 2  | 4%   |
| CARDIOMYOPATHY                                         | 0                        | 0%      | 0       | 0%      | 2       | 2%            | 0                      | 0%      | 0       | 0%      | 2       | 2%            | 0 | 0% | 0 | 0%  | 0  | 0%  | 1  | 2%  | 0 | 0% | 1  | 2%   |
| ATRIAL FIBRILLATION                                    | 0                        | 0%      | 0       | 0%      | 2       | 2%            | 1                      | 1%      | 0       | 0%      | 3       | 2%            | 0 | 0% | 0 | 0%  | 0  | 0%  | 0  | 0%  | 0 | 0% | 0  | 0%   |
| PERICARDIAL HAEMORRHAGE                                | 0                        | 0%      | 0       | 0%      | 0       | 0%            | 0                      | 0%      | 0       | 0%      | 0       | 0%            | 0 | 0% | 0 | 0%  | 0  | 0%  | 1  | 2%  | 0 | 0% | 1  | 2%   |
| TACHYCARDIA                                            | 0                        | 0%      | 0       | 0%      | 1       | 1%            | 0                      | 0%      | 0       | 0%      | 1       | 1%            | 0 | 0% | 0 | 0%  | 0  | 0%  | 0  | 0%  | 0 | 0% | 0  | 0%   |
| CARDIAC ARREST                                         | 0                        | 0%      | 0       | 0%      | 0       | 0%            | 0                      | 0%      | 1       | 1%      | 1       | 1%            | 0 | 0% | 0 | 0%  | 0  | 0%  | 0  | 0%  | 0 | 0% | 0  | 0%   |
| CARDIAC FAILURE                                        | 0                        | 0%      | 0       | 0%      | 1       | 1%            | 0                      | 0%      | 0       | 0%      | 1       | 1%            | 0 | 0% | 0 | 0%  | 0  | 0%  | 0  | 0%  | 0 | 0% | 0  | 0%   |
| ATRIAL FLUTTER                                         | 0                        | 0%      | 0       | 0%      | 1       | 1%            | 0                      | 0%      | 0       | 0%      | 1       | 1%            | 0 | 0% | 0 | 0%  | 0  | 0%  | 0  | 0%  | 0 | 0% | 0  | 0%   |
| CARDIAC FAILURE CONGESTIVE                             | 0                        | 0%      | 0       | 0%      | 1       | 1%            | 0                      | 0%      | 0       | 0%      | 1       | 1%            | 0 | 0% | 0 | 0%  | 0  | 0%  | 0  | 0%  | 0 | 0% | 0  | 0%   |
| SUPRAVENTRICULAR TACHYCARDIA                           | 0                        | 0%      | 0       | 0%      | 1       | 1%            | 0                      | 0%      | 0       | 0%      | 1       | 1%            | 0 | 0% | 0 | 0%  | 0  | 0%  | 0  | 0%  | 0 | 0% | 0  | 0%   |
| PERICARDIAL EFFUSION                                   | 0                        | 0%      | 0       | 0%      | 0       | 0%            | 1                      | 1%      | 0       | 0%      | 1       | 1%            | 0 | 0% | 0 | 0%  | 0  | 0%  | 0  | 0%  | 0 | 0% | 0  | 0%   |
| VENTRICULAR TACHYCARDIA                                | 0                        | 0%      | 0       | 0%      | 0       | 0%            | 1                      | 1%      | 0       | 0%      | 1       | 1%            | 0 | 0% | 0 | 0%  | 0  | 0%  | 0  | 0%  | 0 | 0% | 0  | 0%   |

\*The protocol required reporting of all grade 3 or grade 4 AEs, and all SAEs, as well as any AE leading to plasma discontinuation (regardless of grade).



**References:**

1. Beigel JH, Tebas P, Elie-Turenne MC, Bajwa E, Bell TE, Cairns CB, et al. Immune plasma for the treatment of severe influenza: an open-label, multicentre, phase 2 randomised study. *Lancet Respir Med*. 2017;5(6):500-11.
2. Shu B, Wu KH, Emery S, Villanueva J, Johnson R, Guthrie E, et al. Design and performance of the CDC real-time reverse transcriptase PCR swine flu panel for detection of 2009 A (H1N1) pandemic influenza virus. *J Clin Microbiol*. 2011;49(7):2614-9.
3. Centers for Disease Control - 510(k) Summary for Centers for Disease Control and Prevention human influenza virus real-time RT-PCR detection and characterization panel. 2008 [Available from: [http://www.accessdata.fda.gov/cdrh\\_docs/pdf8/k080570.pdf](http://www.accessdata.fda.gov/cdrh_docs/pdf8/k080570.pdf).
4. World Health Organization - Manual for the laboratory diagnosis and virological surveillance of influenza. Geneva: World Health Organization; 2011.
